# Supplementary material
Source: PubMed Central journal article supplement (PMC3281604)

## SUPPLEMENTARY FIGURE LEGENDS

### Figure S1. Lithium Chloride enhances EMT markers in cultured AECT cells.

AECTs expressing wt and mutant  $\beta$ -catenins were treated with Adeno-Cre and seeded on Fn. Cells were starved and treated without or with LiCl (20 mM) for 3 days and then EMT markers analyzed by immunoblotting as described in the main text. LiCl enhanced TGF $\beta$ 1-induced Twist1,  $\alpha$ -SMA, and col I in the presence of wt or Y654E- $\beta$ -catenin, but not in the absence of  $\beta$ -catenin nor replacement by Y654F mutant.

Figure S1

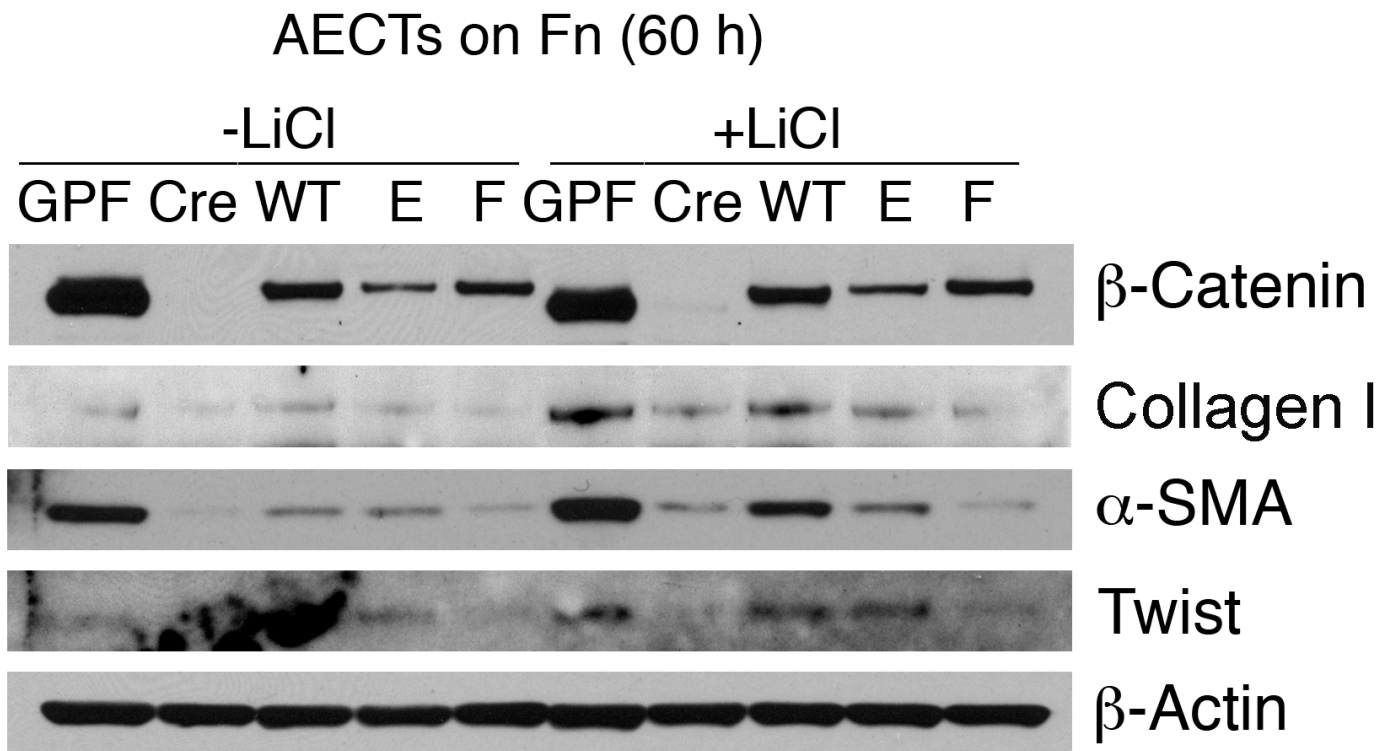

Supplement: supp_M111.322123_jbc.M111.322123-1.pdf [file supp_M111.322123_jbc.M111.322123-1.pdf]
